# Supplementary material for: On the factors affecting product distribution in laccase-catalyzed oxidation of a lignin model compound vanillyl alcohol: experimental and computational evaluation
Source: Royal Society of Chemistry journal article supplement (doi:10.1039/c3ob40783g), 2013-01-01

# On the factors affecting product distribution in laccase-catalyzed oxidation of a lignin model compound vanillyl alcohol: experimental and computational evaluation

Maarit Lahtinen, Petri Heinonen, Mikko Oivanen, Pirkko Karhunen, Kristiina Kruus and Jussi Sipilä

## Table of contents:

|                                                                                                                                                |        |
|------------------------------------------------------------------------------------------------------------------------------------------------|--------|
| <b>Table S1</b> Computed total energy values at DFT((U)B3LYP)/6-311++G(2df,2p) level of theory for all products and intermediates.....         | Page 2 |
| <b>Table S2</b> Calculated free energy changes in water and gas phase for reaction steps depicted in <b>Figs. 2 and 3</b> of the article. .... | Page 3 |
| <b><sup>1</sup>H NMR</b> spectrum of 4-hydroxymethyl-2-(4'-hydroxymethyl-2'-methoxyphenoxy)-6-methoxyphenol ( <b>3</b> ).....                  | Page 4 |
| <b><sup>13</sup>C NMR</b> spectrum of 4-hydroxymethyl-2-(4'-hydroxymethyl-2'-methoxyphenoxy)-6-methoxyphenol ( <b>3</b> ).....                 | Page 5 |

**Table S1** Computed total energy values at DFT((U)B3LYP)/6-311++G(2df,2p) level of theory for all products and intermediates ( $10^3 \text{ kcal mol}^{-1}$ ).

|                                         | dG <sub>s</sub> PCM E <sub>tot</sub> | E <sub>tot</sub> (gas phase) | dG (298.15 K) | Hf (298.15 K) | dG (318.15 K) |
|-----------------------------------------|--------------------------------------|------------------------------|---------------|---------------|---------------|
| 1                                       | -336.6165558                         | -336.6095805                 | -336.5255135  | -336.4953605  | -336.5275705  |
| 1R                                      | -336.2188473                         | -336.2073760                 | -336.1319150  | -336.1014650  | -336.1339850  |
| 1P <sup>-</sup>                         | -336.3126613                         | -336.2505168                 | -336.1757318  | -336.1457078  | -336.1777728  |
| 2                                       | -672.4769651                         | -672.4640643                 | -672.2941403  | -672.2482273  | -672.2972763  |
| 2QQ (RR.SS)                             | -672.4399431                         | -672.4219224                 | -672.2550344  | -672.2072474  | -672.2582964  |
| 2QQ (meso)                              | -672.4402958                         | -672.4211332                 | -672.2538332  | -672.2066872  | -672.2570512  |
| 2QHQ (RR.SS)                            | -672.7023151                         | -672.6531198                 | -672.4789558  | -672.4308408  | -672.4822398  |
| 2QHQ (meso)                             | -672.7041667                         | -672.6586234                 | -672.4823984  | -672.4360794  | -672.4855614  |
| 2PQ                                     | -672.4595791                         | -672.4434703                 | -672.2765383  | -672.2282743  | -672.2798323  |
| 2PQH                                    | -672.7231089                         | -672.6769043                 | -672.5013543  | -672.4537523  | -672.5046043  |
| 2PQ <sup>-</sup>                        | -672.1526762                         | -672.1016277                 | -671.9426957  | -671.8956067  | -671.9459107  |
| 2PP <sup>-</sup>                        | -672.1828309                         | -672.1345262                 | -671.9747792  | -671.9289162  | -671.9779112  |
| (2PQ <sup>-</sup> →2PP <sup>-</sup> )TS | -672.1470819                         | -672.096,9530                | -671.939,5220 | -671.893,2180 | -671.9426370  |
| 3                                       | -672.4629861                         | -672.4512165                 | -672.2829335  | -672.2358575  | -672.2861465  |
| 3Q                                      | -672.4414818                         | -672.4268693                 | -672.2592223  | -672.2119193  | -672.2624503  |
| 3QH                                     | -672.7028314                         | -672.6549693                 | -672.4792403  | -672.4323003  | -672.4824443  |
| 3P <sup>-</sup>                         | -672.1607348                         | -672.1110126                 | -671.9526836  | -671.9050206  | -671.9559366  |
| 4                                       | -335.8660531                         | -335.8586744                 | -335.7886464  | -335.7595954  | -335.7906214  |
| 4R                                      | -335.4638252                         | -335.4539758                 | -335.3924078  | -335.3630728  | -335.3944008  |
| 4CAT                                    | -336.0922604                         | -336.0415716                 | -335.9651816  | -335.9351366  | -335.9672256  |
| 4Q                                      | -335.8499063                         | -335.8371210                 | -335.7672160  | -335.7380610  | -335.7691980  |
| 4QH                                     | -336.125511                          | -336.0767082                 | -335.9981482  | -335.9690472  | -336.0001272  |
| 4P <sup>-</sup>                         | -335.5685687                         | -335.5176521                 | -335.4560611  | -335.4274111  | -335.4580081  |
| (1+1)Q                                  | -672.4447167                         | -672.4305468                 | -672.2626708  | -672.2158108  | -672.2658688  |
| (1+4)Q                                  | -671.6934143                         | -671.6791892                 | -671.5245982  | -671.4793872  | -671.5276842  |
| 6                                       | -264.7619459                         | -264.7545276                 | -264.6889516  | -264.6626206  | -264.6907396  |
| 6R                                      | -264.3605745                         | -264.3516357                 | -264.2948537  | -264.2679647  | -264.2966787  |
| 6BzR                                    | -264.3615687                         | -264.3544098                 | -264.2979878  | -264.2712648  | -264.2998038  |
| (6+6R)TS                                | -529.1043466                         | -529.0921315                 | -528.9603125  | -528.9186965  | -529.0921315  |
| phenol                                  | -192.9009767                         | -192.8963854                 | -192.8491274  | -192.8268384  | -192.8506384  |
| phenolate                               | -192.5987890                         | -192.5410947                 | -192.5025167  | -192.4804887  | -192.5040097  |
| O <sub>2</sub>                          | -94.28962326                         | -94.28896257                 | -94.29852057  | -94.28455857  | -94.29946157  |
| H <sub>2</sub> O                        | -47.96387896                         | -47.95835046                 | -47.95661446  | -47.94274946  | -47.95755046  |
| OH <sup>-</sup>                         | -47.64777409                         | -47.56137833                 | -47.56636433  | -47.55408033  | -47.56719333  |

**Table S2** Calculated free energy changes in water and gas phase for reaction steps depicted in **Figs 2 and 3** of the article (at 298.15 K, kcal mol<sup>-1</sup>).

| Reaction                                                | $\Delta G_s$ | $\Delta G_g$ |
|---------------------------------------------------------|--------------|--------------|
| $1 + \frac{1}{4} O_2 \rightarrow 1R + \frac{1}{2} H_2O$ | -11.8        | -10.1        |
| $4 + \frac{1}{4} O_2 \rightarrow 4R + \frac{1}{2} H_2O$ | -7.3         | -7.4         |
| $2\ 1R \rightarrow 2QQ\ (RR.\ SS)$                      | -2.2         | 8.8          |
| $2\ 1R \rightarrow 2QQ\ (meso)$                         | -2.6         | 10.0         |
| $2QQ + (PhO^-)H^+ \rightarrow 2QHQ + (PhO^-)\ (RR.SS)$  | 26.2         | -221.8       |
| $2QQ + (PhO^-)H^+ \rightarrow 2QHQ + (PhO^-)\ (meso)$   | 24.7         | -226.5       |
| $2QHQ + (PhO^-) \rightarrow 2PQ + (PhO^-)H^+\ (RR.SS)$  | -45.8        | 200.3        |
| $2QHQ + (PhO^-) \rightarrow 2PQ + (PhO^-)H^+\ (meso)$   | -44.0        | 203.7        |
| $2PQ + (PhO^-)H^+ \rightarrow 2PQH + (PhO^-)$           | 25.0         | -222.7       |
| $2PQH + (PhO^-) \rightarrow 2 + (PhO^-)H^+$             | -42.4        | 205.1        |
| $2QQ + (PhO^-) \rightarrow 2PQ^- + (PhO^-)H^+\ (RR.SS)$ | -1.3         | 310.2        |
| $2QQ + (PhO^-) \rightarrow 2PQ^- + (PhO^-)H^+\ (meso)$  | -0.9         | 309.0        |
| $2PQ^- + (PhO^-)H^+ \rightarrow 2PQ + (PhO^-)$          | -18.3        | 331.7        |
| $2PQ + (PhO^-) \rightarrow 2PP^- + (PhO^-)H^+$          | -11.8        | 299.6        |
| $2PP^- + (PhO^-)H^+ \rightarrow 2 + (PhO^-)$            | -5.6         | -317.3       |
| $2PQ^- \rightarrow (2PQ^- \rightarrow 2PP^-)TS$         | -3.2         | 5.6          |
| $2\ 1R \rightarrow 3Q$                                  | -3.8         | 4.6          |
| $3Q + (PhO^-)H^+ \rightarrow 3QH + (PhO^-)$             | 27.2         | -217.9       |
| $3QH + (PhO^-) \rightarrow 3 + (PhO^-)H^+$              | -48.7        | 194.2        |
| $3Q + (PhO^-) \rightarrow 3P^- + (PhO^-)H^+$            | -7.8         | 304.4        |
| $3P^- + (PhO^-)H^+ \rightarrow 3 + (PhO^-)$             | -13.7        | -328.1       |
| $2\ 1R \rightarrow 4Q + 1$                              | -28.8        | -28.9        |
| $1R + 4R \rightarrow 4Q + 4$                            | -33.3        | -31.5        |
| $4Q + (PhO^-)H^+ \rightarrow 4QH + (PhO^-)$             | 13.0         | -228.8       |
| $4QH + (PhO^-) \rightarrow 4 + (PhO^-)H^+$              | -29.1        | 207.4        |
| $4Q + (PhO^-) \rightarrow 4P^- + (PhO^-)H^+$            | -7.2         | 309.0        |
| $4P^- + (PhO^-)H^+ \rightarrow 4 + (PhO^-)$             | -8.9         | -330.5       |
| $1R + 1R \rightarrow 4CAT + 1P^-$                       | 32.8         | 122.9        |
| $1R + 4R \rightarrow 4CAT + 4P^-$                       | 21.8         | 103.1        |
| $4CAT + (PhO^-) \rightarrow 4Q + (PhO^-)H^+$            | -46.2        | -148.6       |
| $1P^- + (PhO^-)H^+ \rightarrow 1 + (PhO^-)$             | -15.3        | -3.2         |
| $2\ 1R \rightarrow (1+1)Q$                              | -7.0         | 1.2          |
| $1R + 4R \rightarrow (1+4)Q$                            | -10.7        | -0.3         |
| $(1+1)Q \rightarrow 4Q + 1$                             | -21.7        | -30.1        |
| $(1+4)Q \rightarrow 4Q + 4$                             | -22.5        | -31.3        |
| $6 + 6R \rightarrow 6BzR + 6$                           | -1.0         | -3.1         |
| $6 + 6R \rightarrow (6 + 6R)TS$                         | 18.2         | 23.5         |

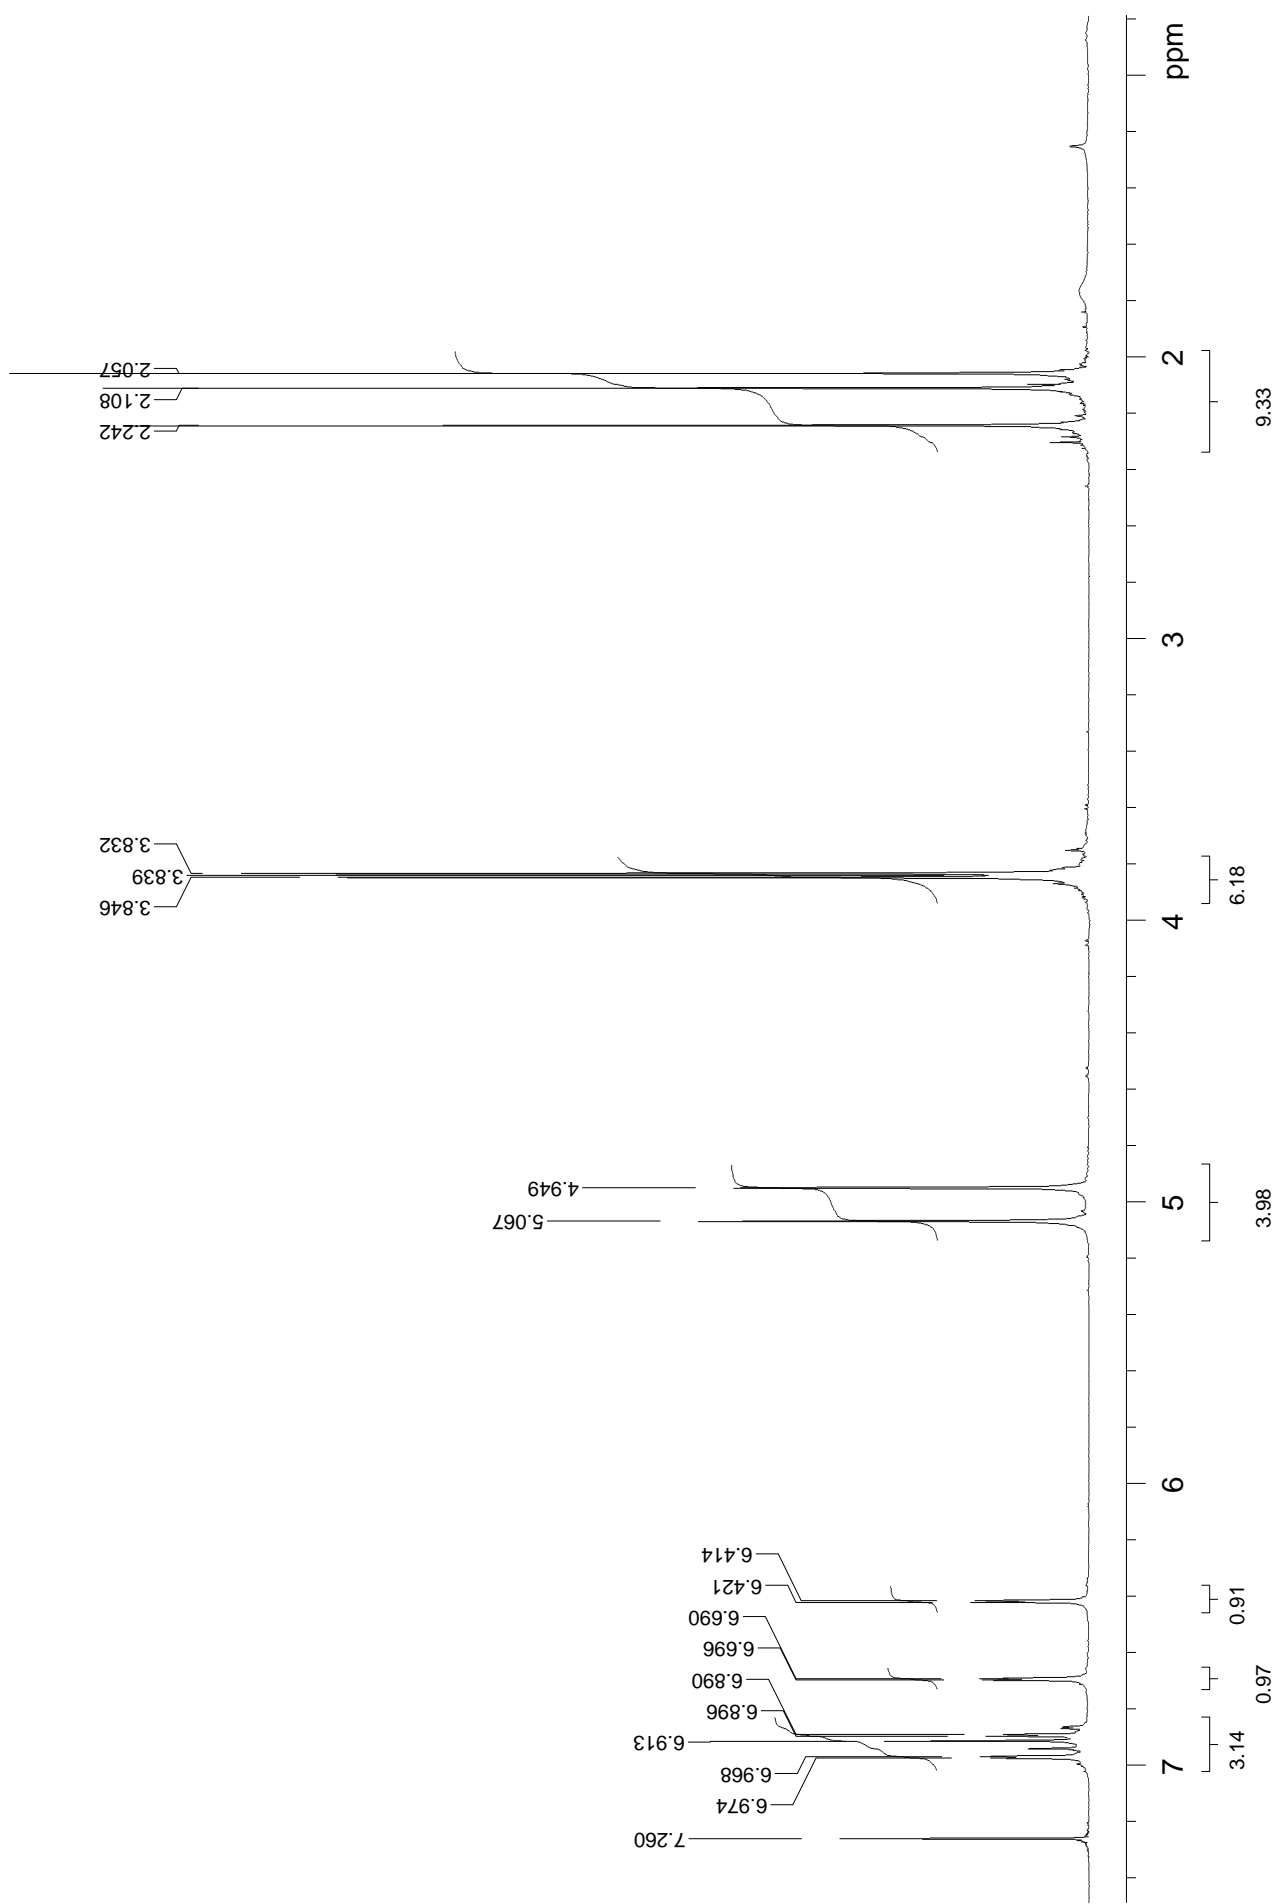

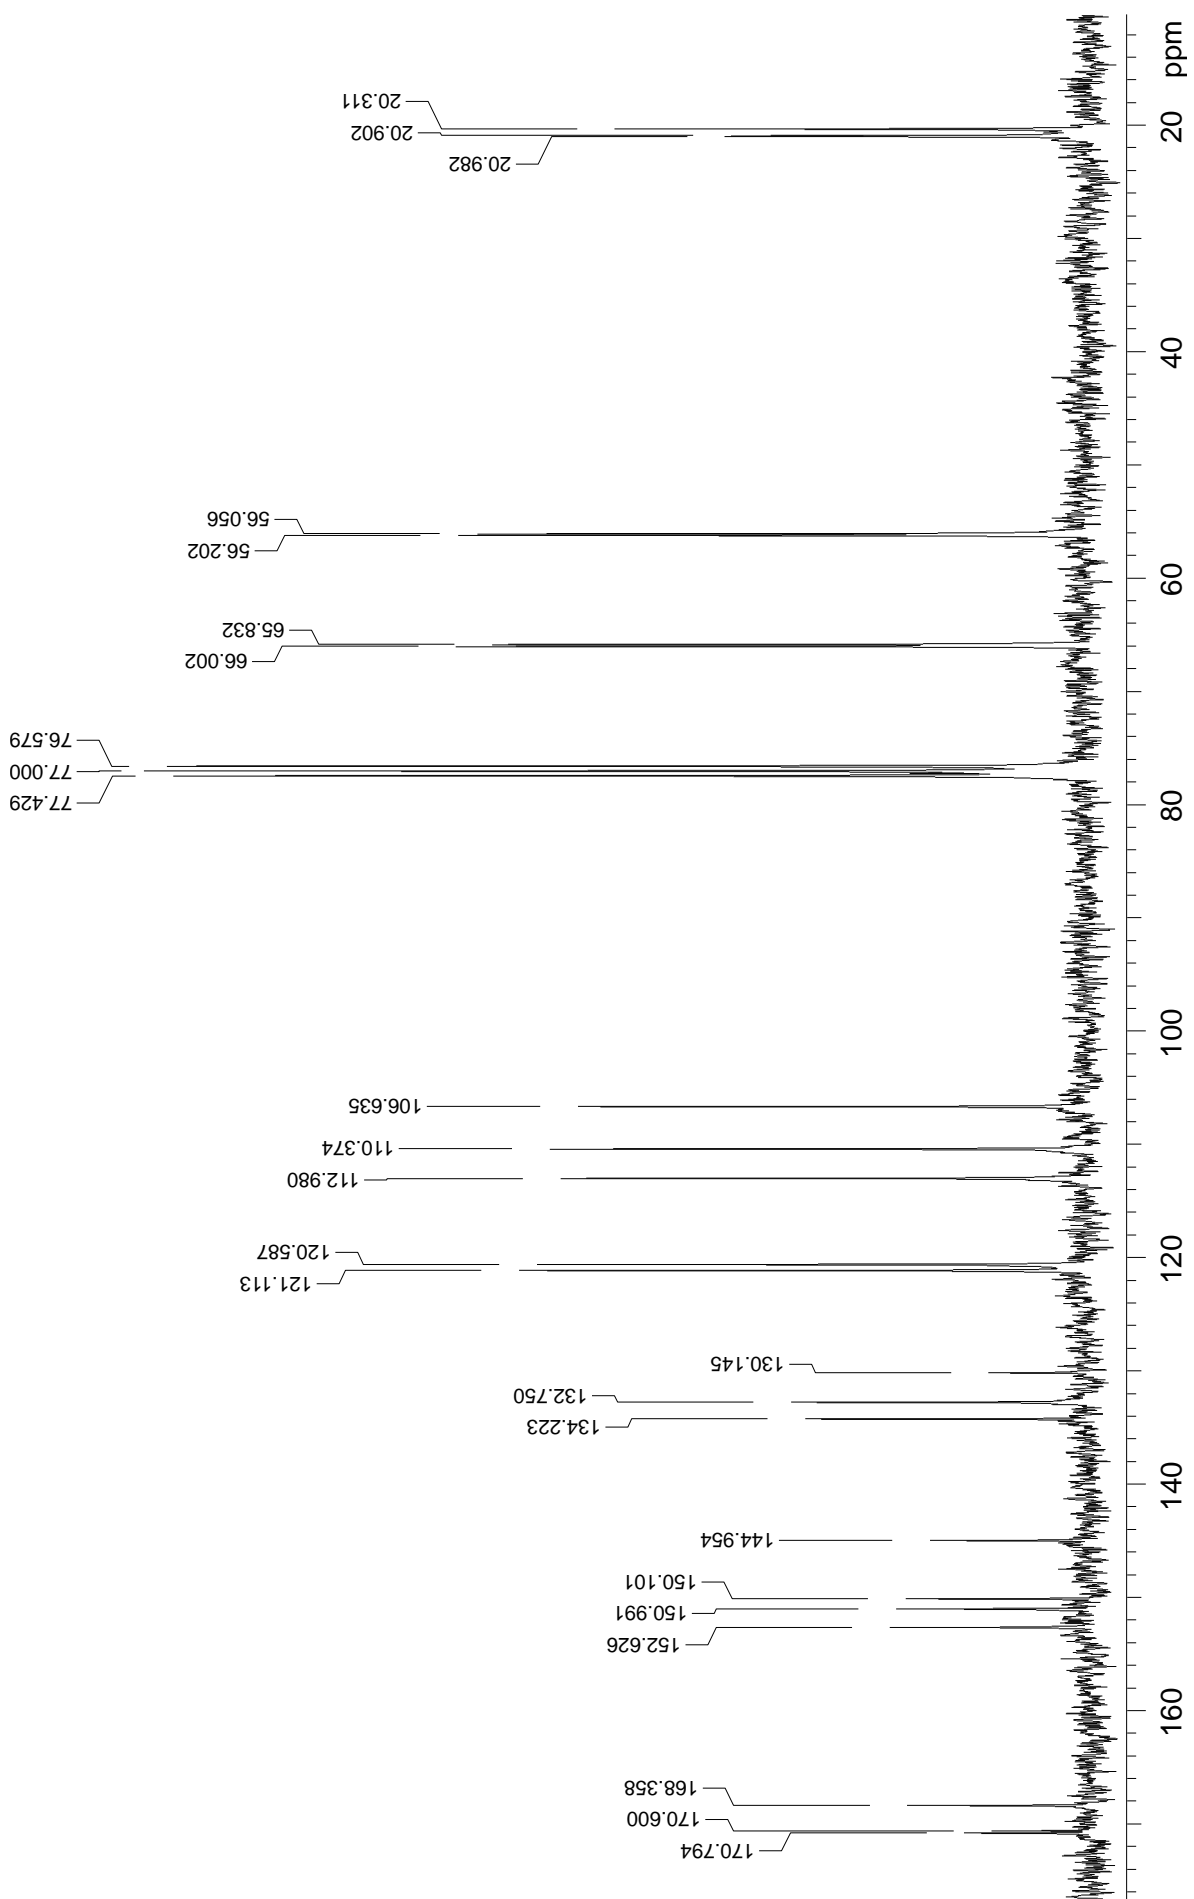

Supplement: c3ob40783g.pdf [file c3ob40783g.pdf]
